# Supplementary material for: Impact of histone H4K16 acetylation on the meiotic recombination checkpoint in Saccharomyces cerevisiae
Source: PubMed Central journal article supplement (PMC5348980; doi:10.15698/mic2016.12.548), 2016-12-04
Supplement: mic-03-606-s01.pdf [file mic-03-606-s01.pdf]

## **SUPPLEMENTAL INFORMATION**

### **Impact of histone H4K16 acetylation on the meiotic recombination checkpoint in *Saccharomyces cerevisiae***

Santiago Cavero<sup>1,2</sup>, Esther Herruzo<sup>1</sup>, David Ontoso<sup>1,3</sup> and Pedro A. San-Segundo<sup>1,\*</sup>

<sup>1</sup> Instituto de Biología Funcional y Genómica. Consejo Superior de Investigaciones Científicas and University of Salamanca, 37007 Salamanca, Spain

\* To whom correspondence should be addressed: Email: [pedross@usal.es](mailto:pedross@usal.es)

**Table S1. *Saccharomyces cerevisiae* strains**

| Strain    | Genotype *                                                                                                                |
|-----------|---------------------------------------------------------------------------------------------------------------------------|
| BR1919-2N | <i>MATa/MATα leu2-3,112 his4-260 ura3-1 ade2-1 thr1-4 trp1-289</i>                                                        |
| BR2495    | <i>MATa/MATα leu2-27/leu2-3,112 his4-280/his4-260 trp1-1/trp1-289 arg4-8/ARG4 thr1-1/thr1-4 cyh10/CYH10 ura3-1 ade2-1</i> |
| DP262     | BR2495 <i>sir2::URA3 PCH2-3HA</i>                                                                                         |
| DP421     | BR1919-2N <i>lys2ΔNheI</i>                                                                                                |
| DP422     | DP421 <i>zip1::LYS2</i>                                                                                                   |
| DP424     | DP421 <i>ndt80::LEU2</i>                                                                                                  |
| DP428     | DP421 <i>zip1::LYS2 ndt80::LEU2</i>                                                                                       |
| DP582     | DP421 <i>zip1::LYS2 ndt80::LEU2 MEK1-GFP::kanMX6</i>                                                                      |
| DP584     | DP421 <i>ndt80::LEU2 MEK1-GFP::kanMX6</i>                                                                                 |
| DP634     | DP421 ( <i>hht1-hhf1::kanMX6 hht2-hhf2::natMX4 p(HHT2-HHF2)::TRP1</i> )                                                   |
| DP635     | DP421 ( <i>hht1-hhf1::kanMX6 hht2-hhf2::natMX4 p(HHT2-hhf2-K16R)::TRP1</i> )                                              |
| DP636     | DP421 ( <i>hht1-hhf1::kanMX6 hht2-hhf2::natMX4 p(HHT2-hhf2-K16Q)::TRP1</i> )                                              |
| DP639     | DP421 ( <i>hht1-hhf1::kanMX6 hht2-hhf2::natMX4 p(HHT2-HHF2)::TRP1 zip1::LYS2</i> )                                        |
| DP640     | DP421 ( <i>hht1-hhf1::kanMX6 hht2-hhf2::natMX4 p(HHT2-hhf2-K16R)::TRP1 zip1::LYS2</i> )                                   |
| DP641     | DP421 ( <i>hht1-hhf1::kanMX6 hht2-hhf2::natMX4 p(HHT2-hhf2-K16Q)::TRP1 zip1::LYS2</i> )                                   |
| DP655     | DP421 <i>zip1::LYS2 ndt80::LEU2 dot1::kanMX6</i>                                                                          |
| DP994     | DP421 <i>hhf1-K16R hhf2-K16R</i>                                                                                          |
| DP995     | DP421 <i>hhf1-K16R hhf2-K16R zip1::LYS2</i>                                                                               |
| DP996     | DP421 <i>hhf1-K16R hhf2-K16R zip1::LYS2 ndt80::LEU2</i>                                                                   |
| DP1000    | DP421 <i>hhf1-K16Q hhf2-K16Q</i>                                                                                          |
| DP1001    | DP421 <i>hhf1-K16Q hhf2-K16Q zip1::LYS2</i>                                                                               |
| DP1002    | DP421 <i>hhf1-K16Q hhf2-K16Q zip1::LYS2 ndt80::LEU2</i>                                                                   |
| DP1073    | DP421 <i>zip1::LYS2 ndt80::LEU2 sas2::natMX4</i>                                                                          |
| DP1086    | DP421 <i>zip1::LYS2 ndt80::LEU2 sir2::URA3</i>                                                                            |
| DP1089    | DP421 <i>zip1::LYS2 ndt80::LEU2 hhf1-K16R hhf2-K16R MEK1-GFP::kanMX6</i>                                                  |
| DP1090    | DP421 <i>zip1::LYS2 ndt80::LEU2 hhf1-K16Q hhf2-K16Q MEK1-GFP::kanMX6</i>                                                  |
| DP1121    | DP421 <i>zip1::LEU2 ndt80::kanMX6 hhf1-K16R hhf2-K16R PCH2-3HA</i>                                                        |
| DP1123    | DP421 <i>zip1::LEU2 ndt80::kanMX6 PCH2-3HA</i>                                                                            |
| DP1124    | DP421 <i>zip1::LEU2 ndt80::kanMX6 sir2::URA3 PCH2-3HA</i>                                                                 |
| DP1139    | DP421 <i>zip1::LEU2 ndt80::kanMX6 hhf1-K16Q hhf2-K16Q PCH2-3HA</i>                                                        |
| DP1401    | DP421 <i>zip1::LYS2 sir2::URA3</i>                                                                                        |
| DP1410    | DP421 <i>zip1::LYS2 sas2::natMX4</i>                                                                                      |

\* Unless indicated, all diploid strains are homozygous for the markers.

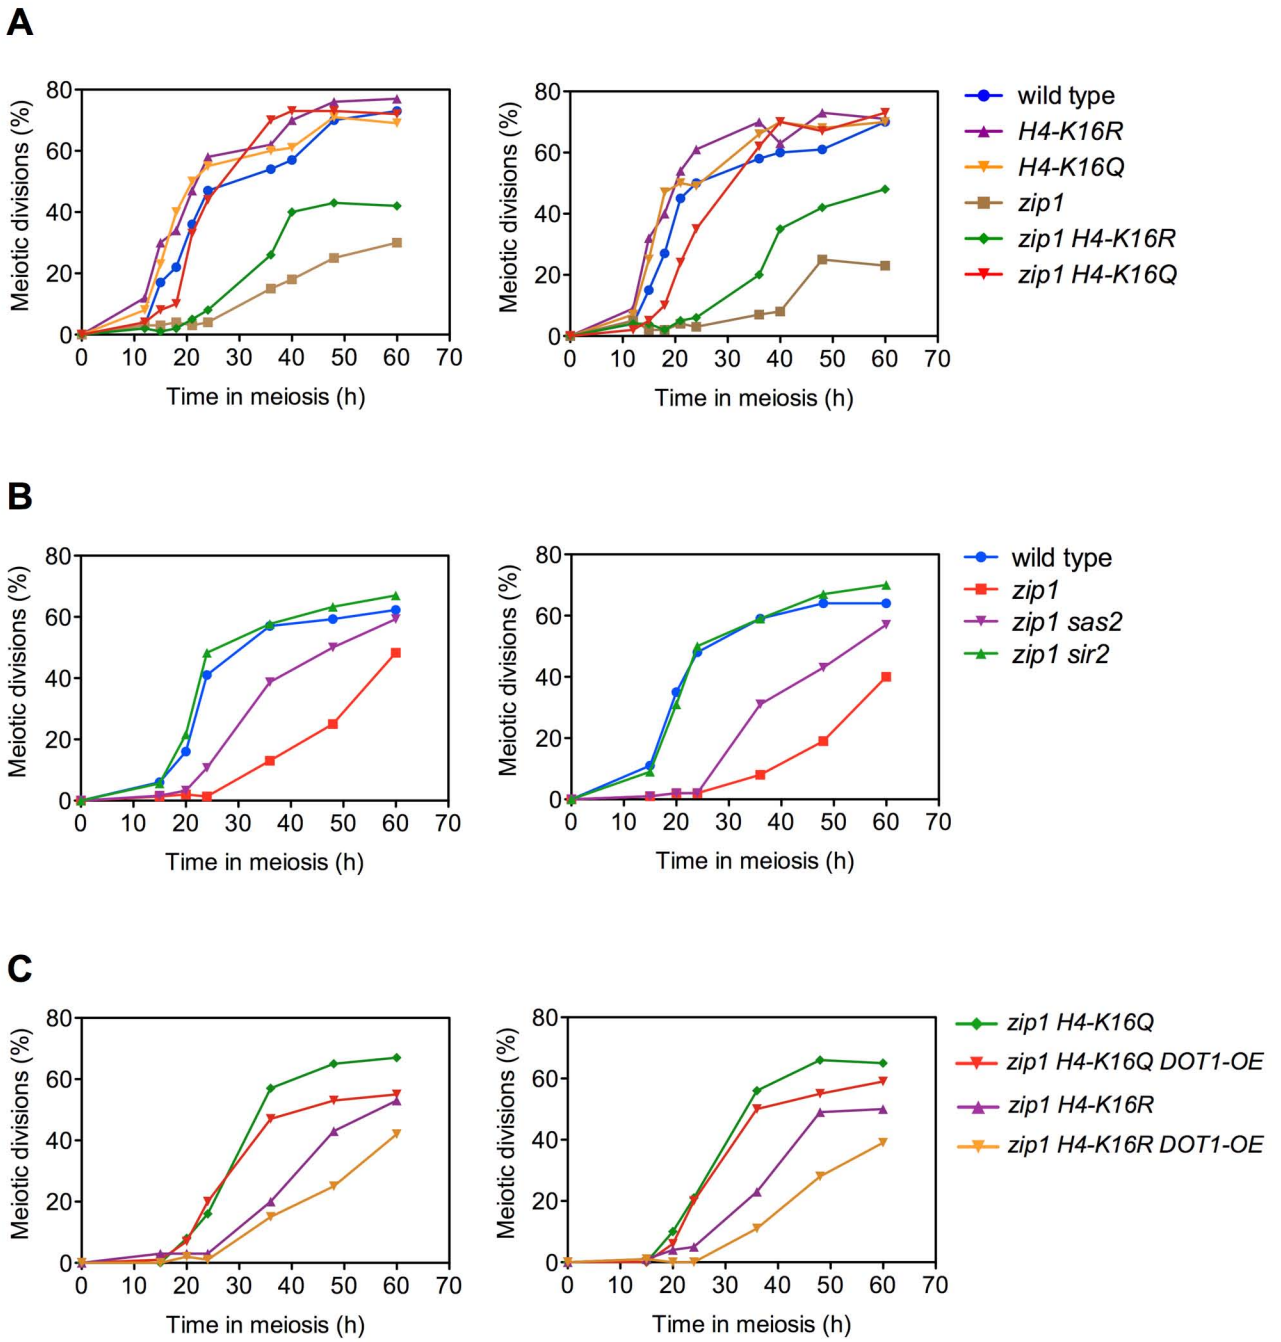

**Figure S1. Additional replicates of the representative meiotic time courses shown in main figures**

(A) Two replicates of the time course shown in Figure 2B

(B) Two replicates of the time course shown in Figure 6A

(C) Two replicates of the time course shown in Figure 7C

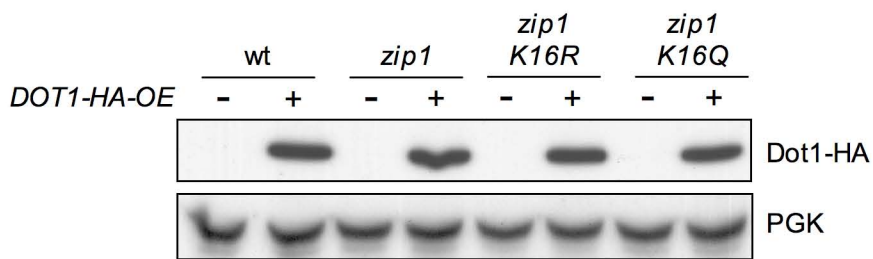

**Figure S2. *DOT1* overexpression in H4K16ac mutants**

Western blot analysis of *DOT1* overexpression in wild-type (DP421), *zip1* (DP422), *zip1 H4-K16R* (DP995) and *zip1 H4-K16Q* (DP1001) strains transformed either with an empty vector or with a high-copy plasmid expressing *DOT1-HA* (pSS63). PGK was used as a loading control.
